# Supplementary figures and images for: Behind Taxonomic Variability: The Functional Redundancy in the Tick Microbiome
Source: MDPI journal article supplement (doi:10.3390/microorganisms8111829), 2020-11-20

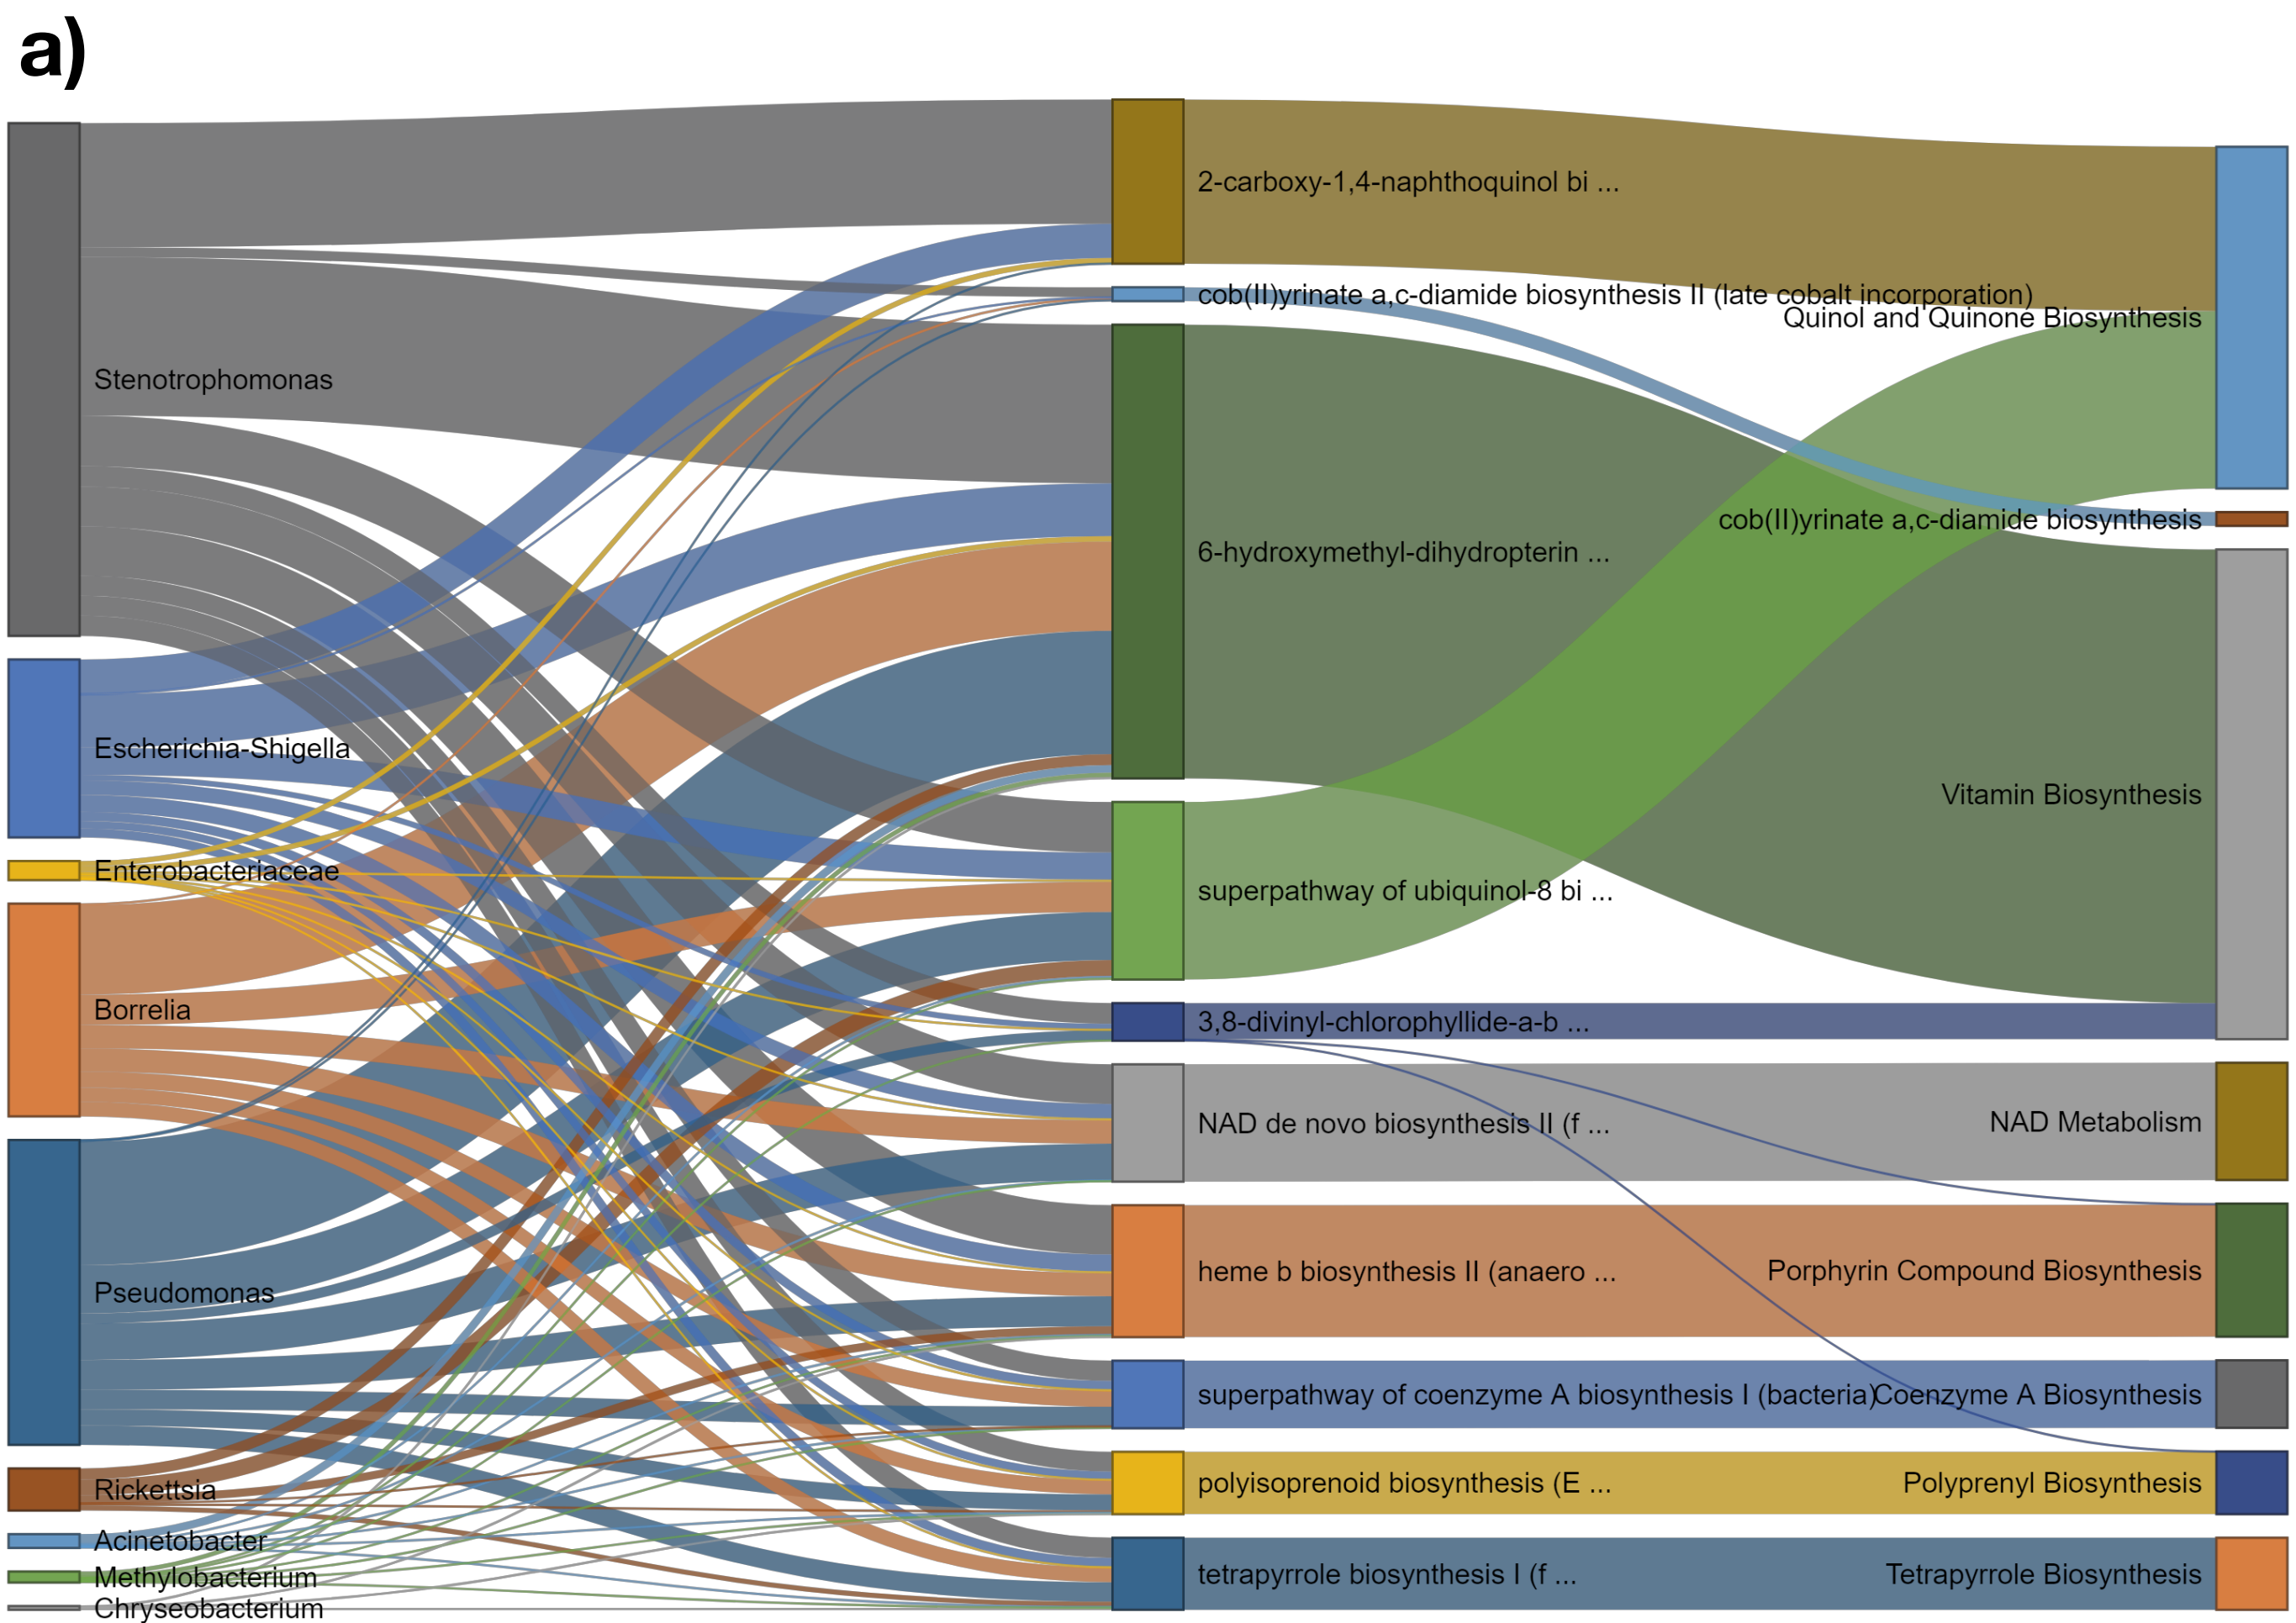

**A**

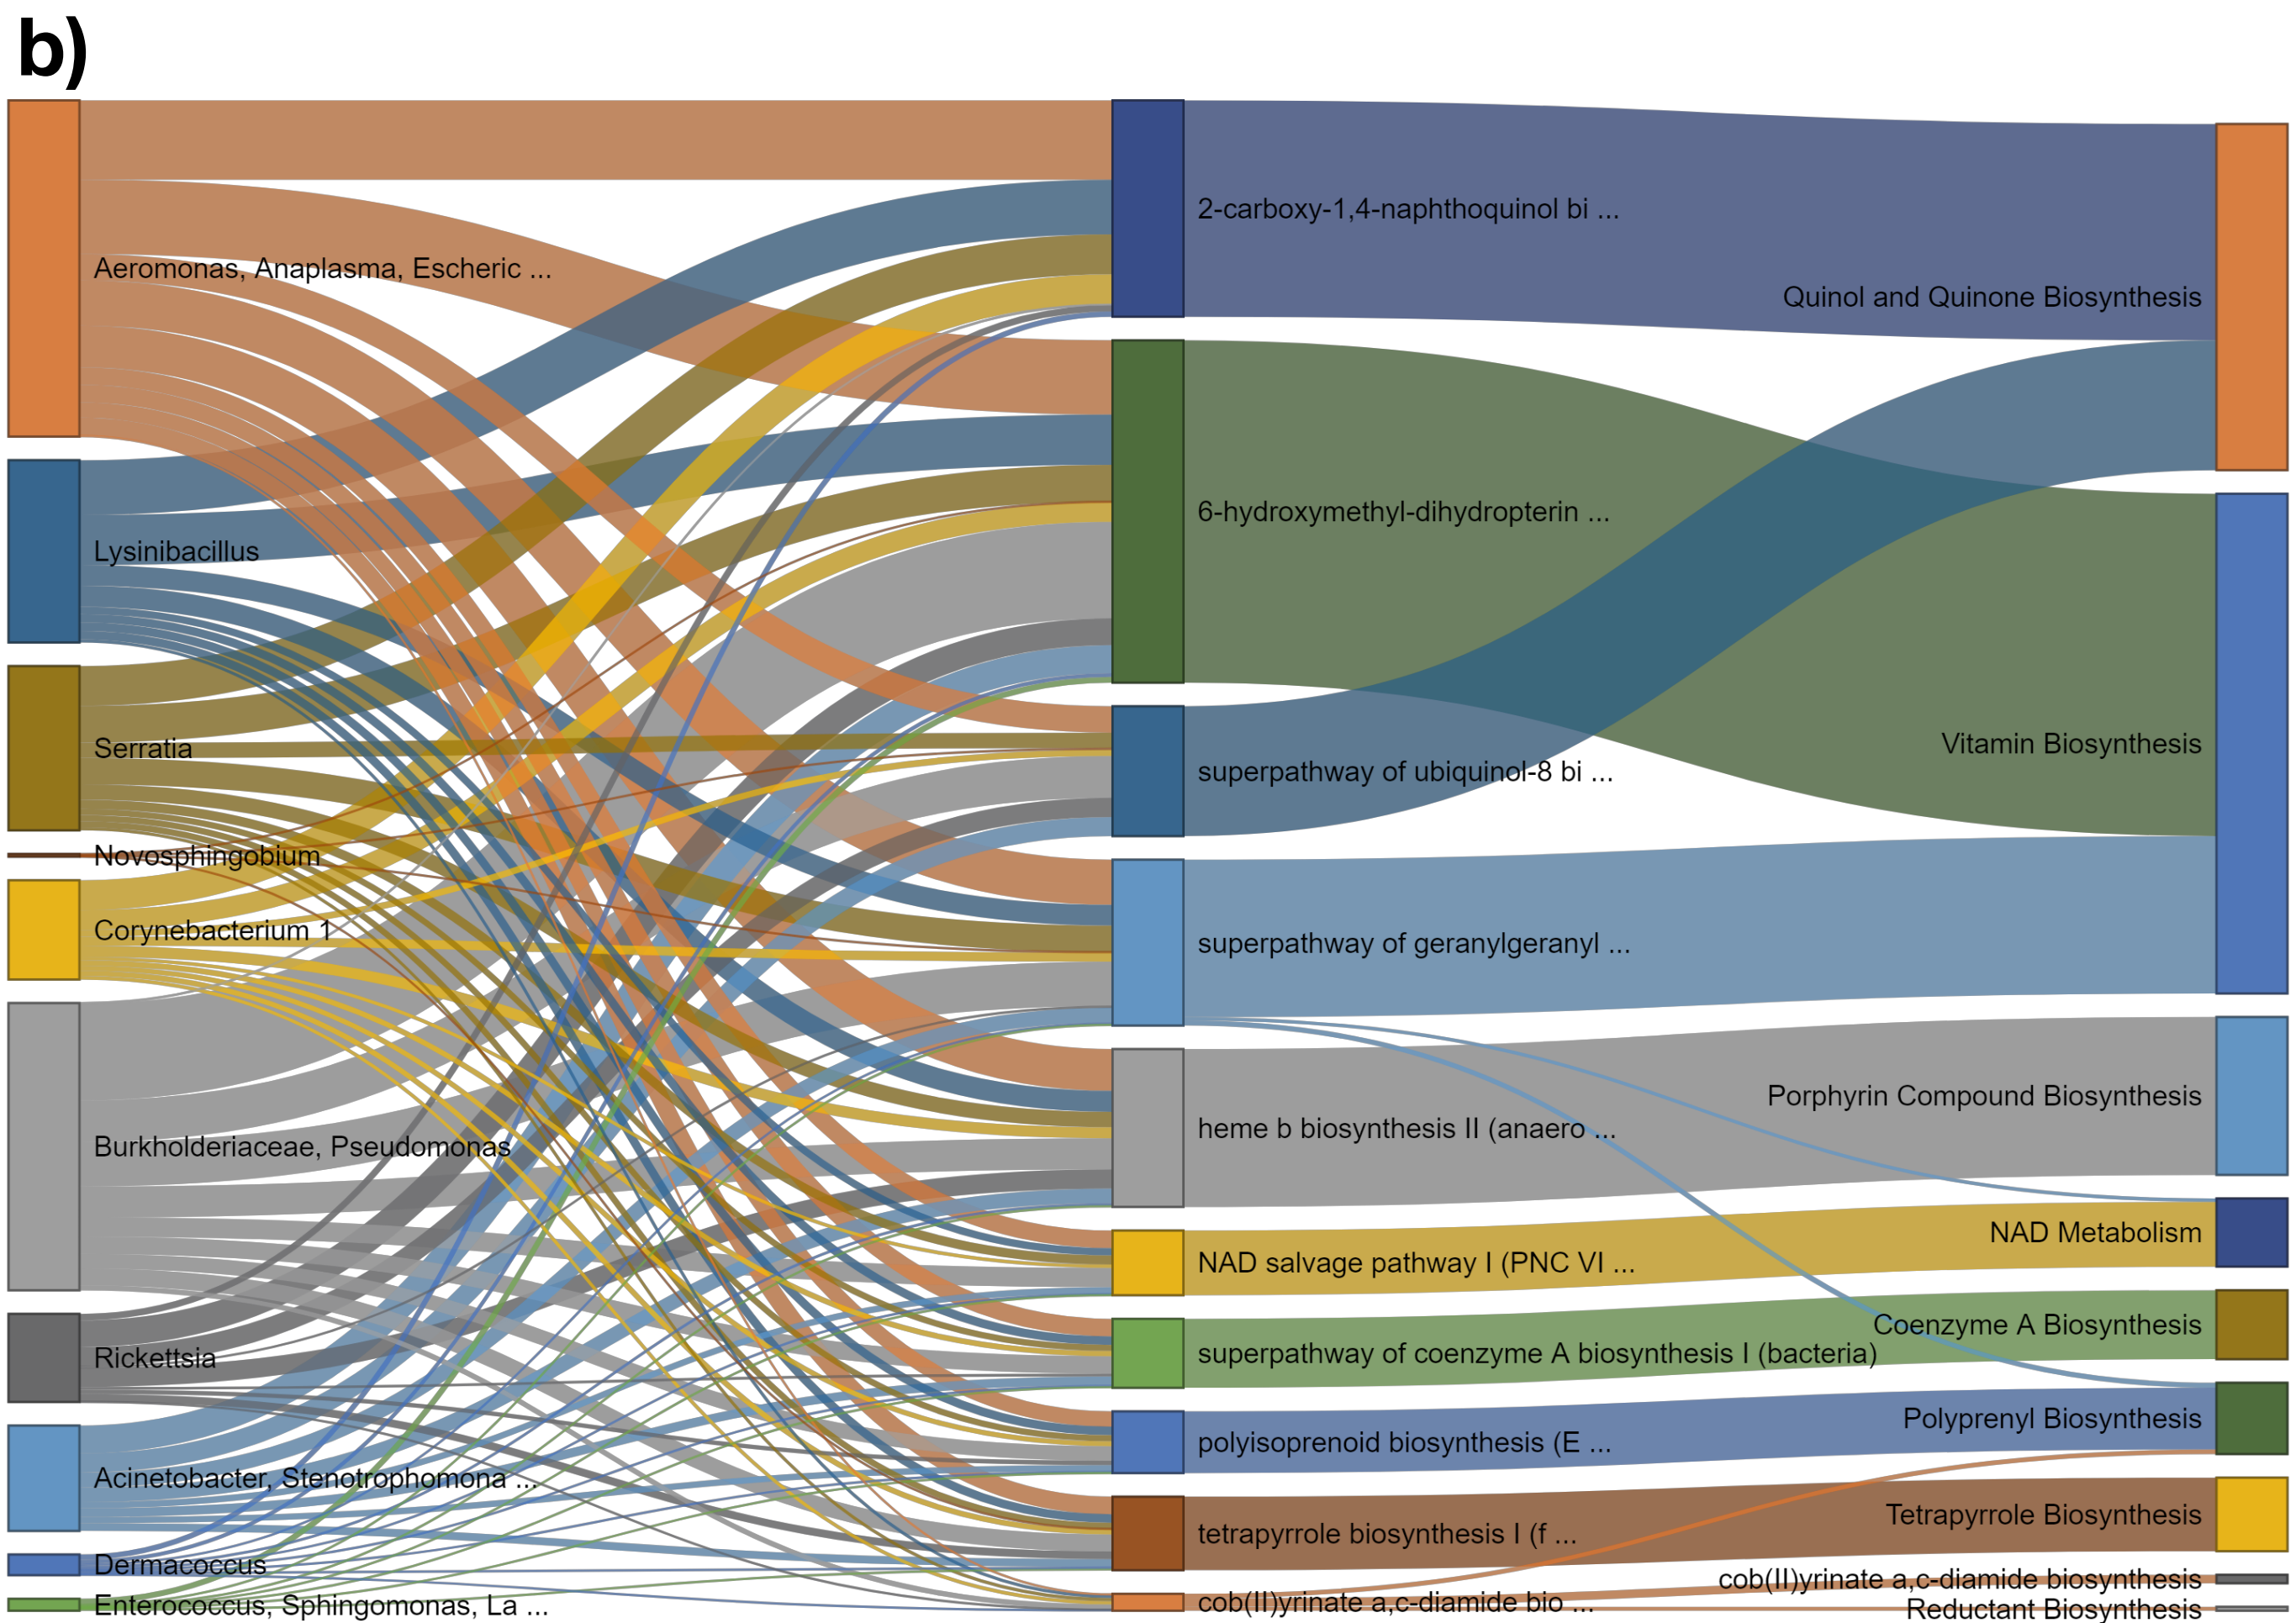

**B**



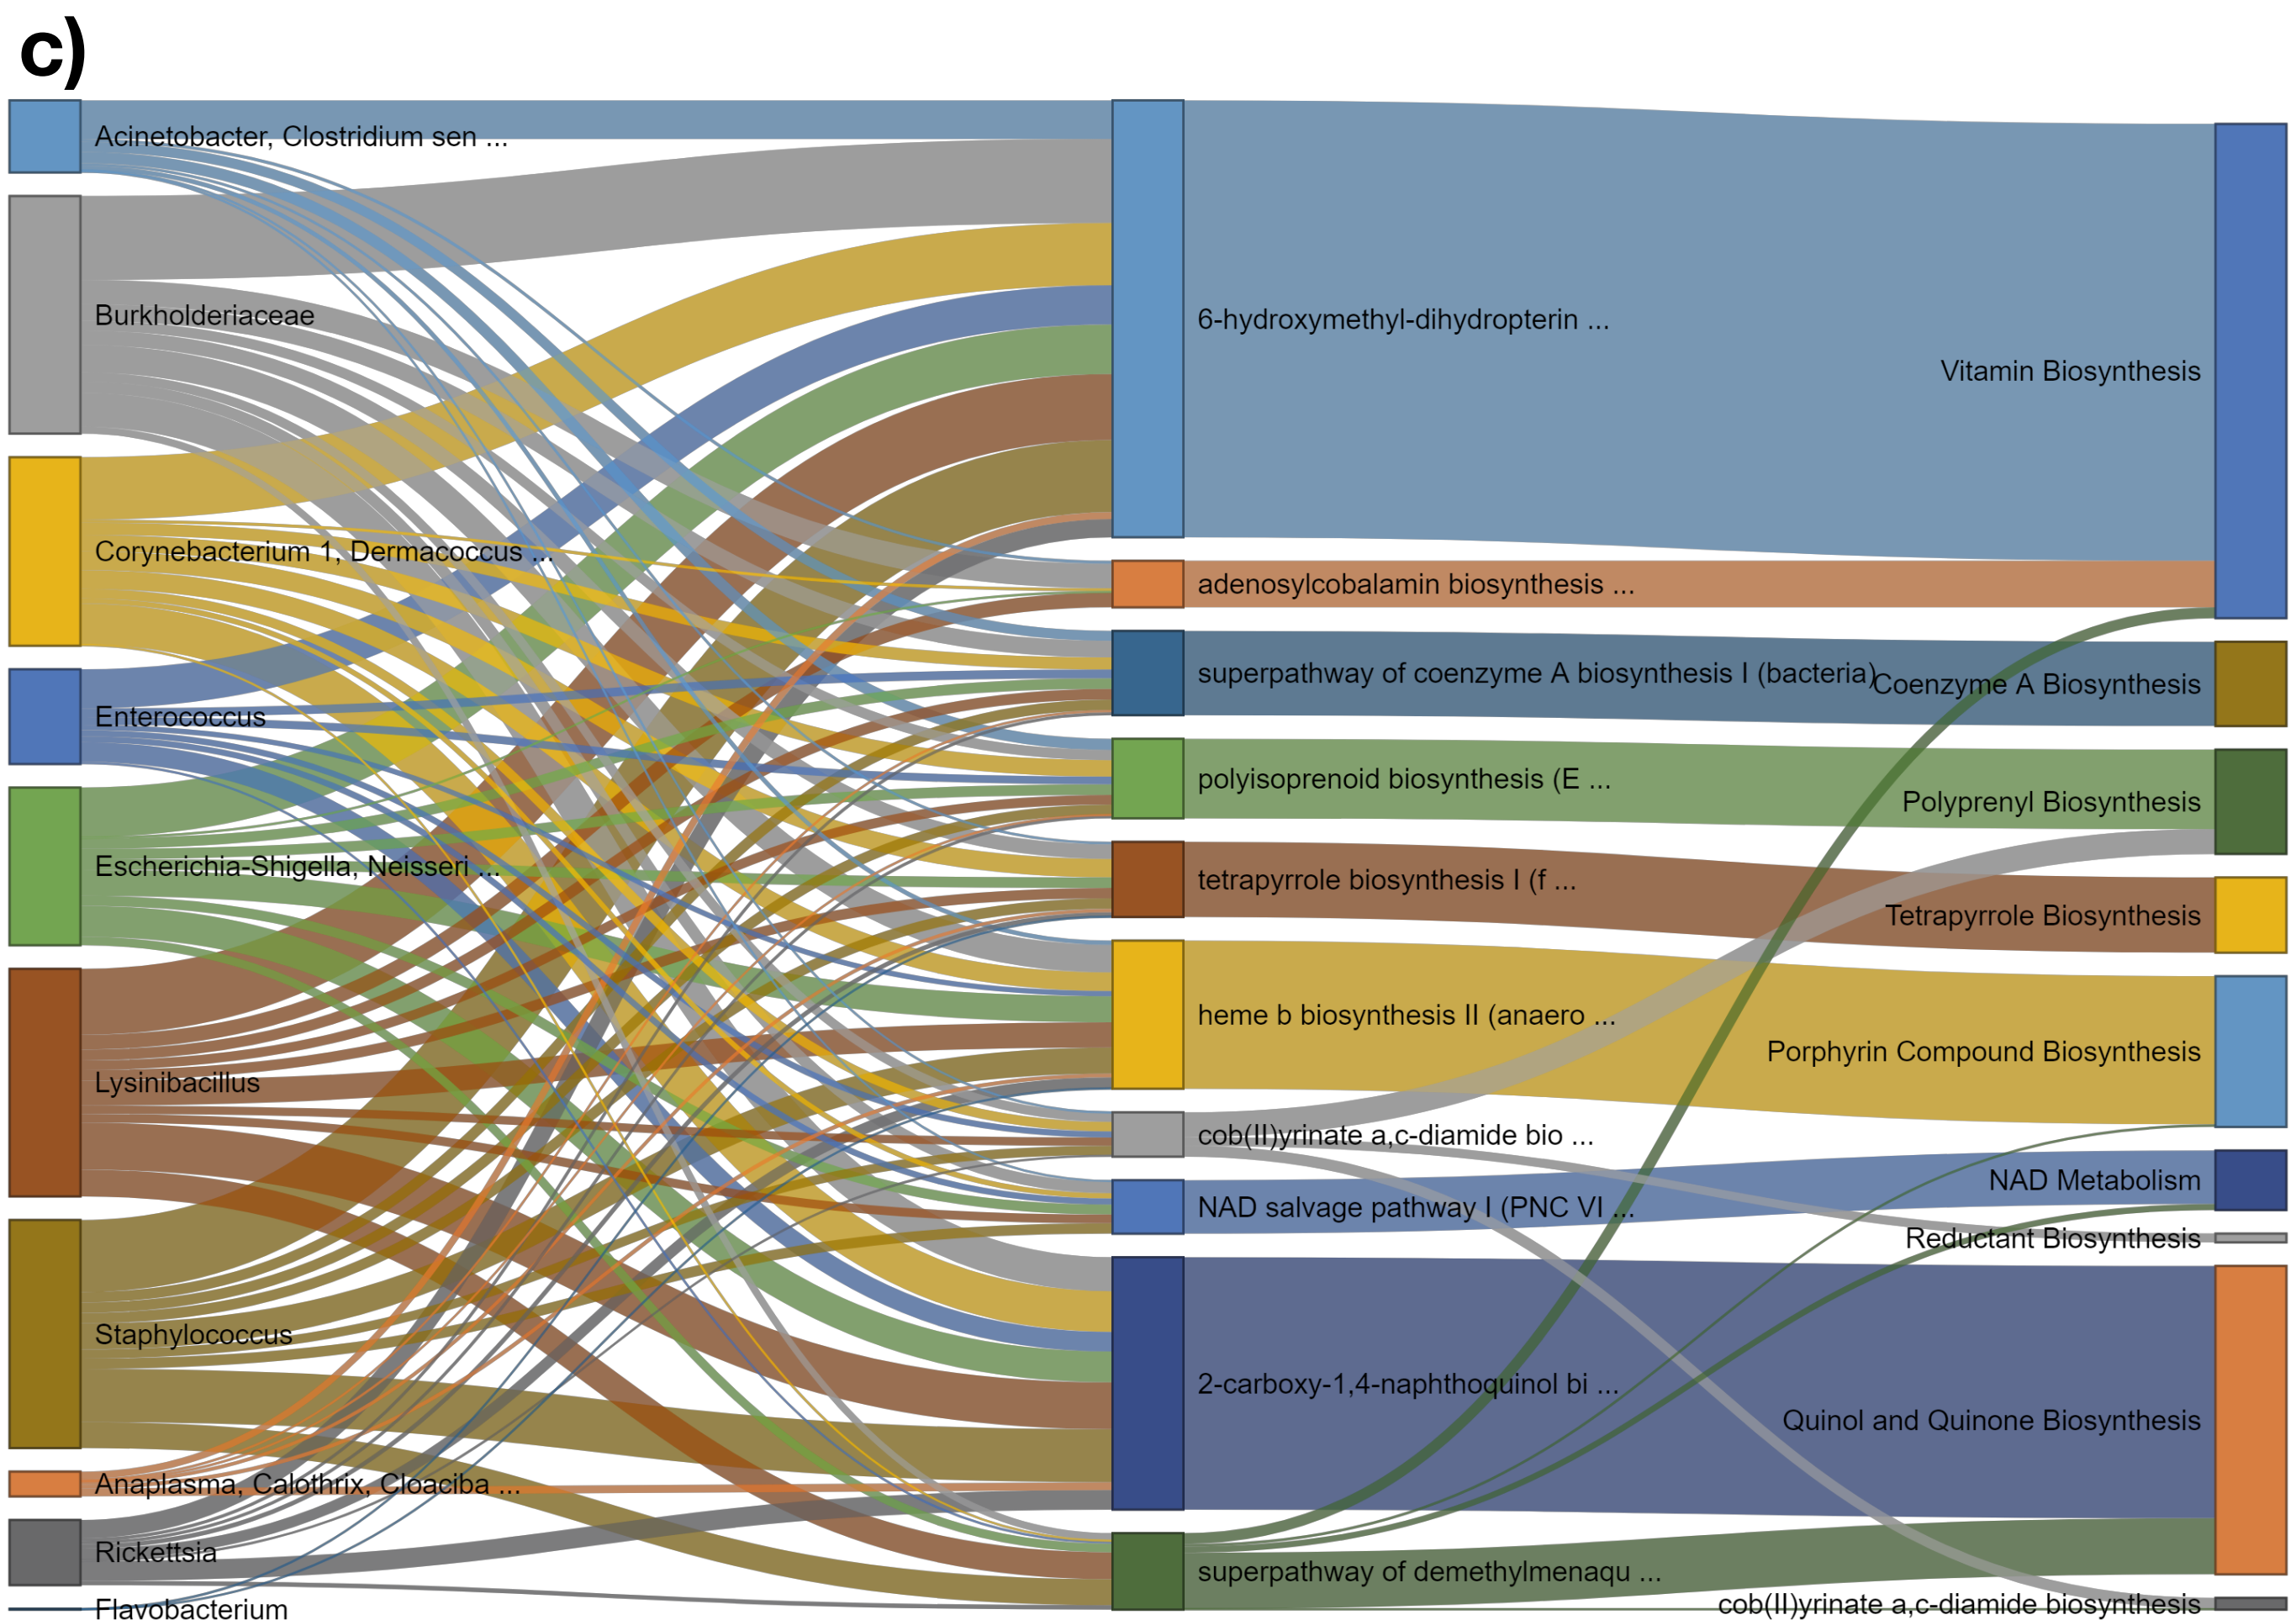

**C**

Supplement: s1 [file s1]
